# Supplementary material for: Alternate assemblies of thionine and Au-nanoparticles on an amino functionalized surfaceElectronic supplementary information (ESI) available: AFM images and cyclic voltammograms. See http://www.rsc.org/suppdata/cc/b2/b204004b/
Source: Royal Society of Chemistry journal article supplement (doi:10.1039/b204004b), 2002-07-09
Supplement: b204004b.doc [file b204004b.doc]

Supplementary Material (ESI) for Chemical Communications

This journal is © The Royal Society of Chemistry 2002


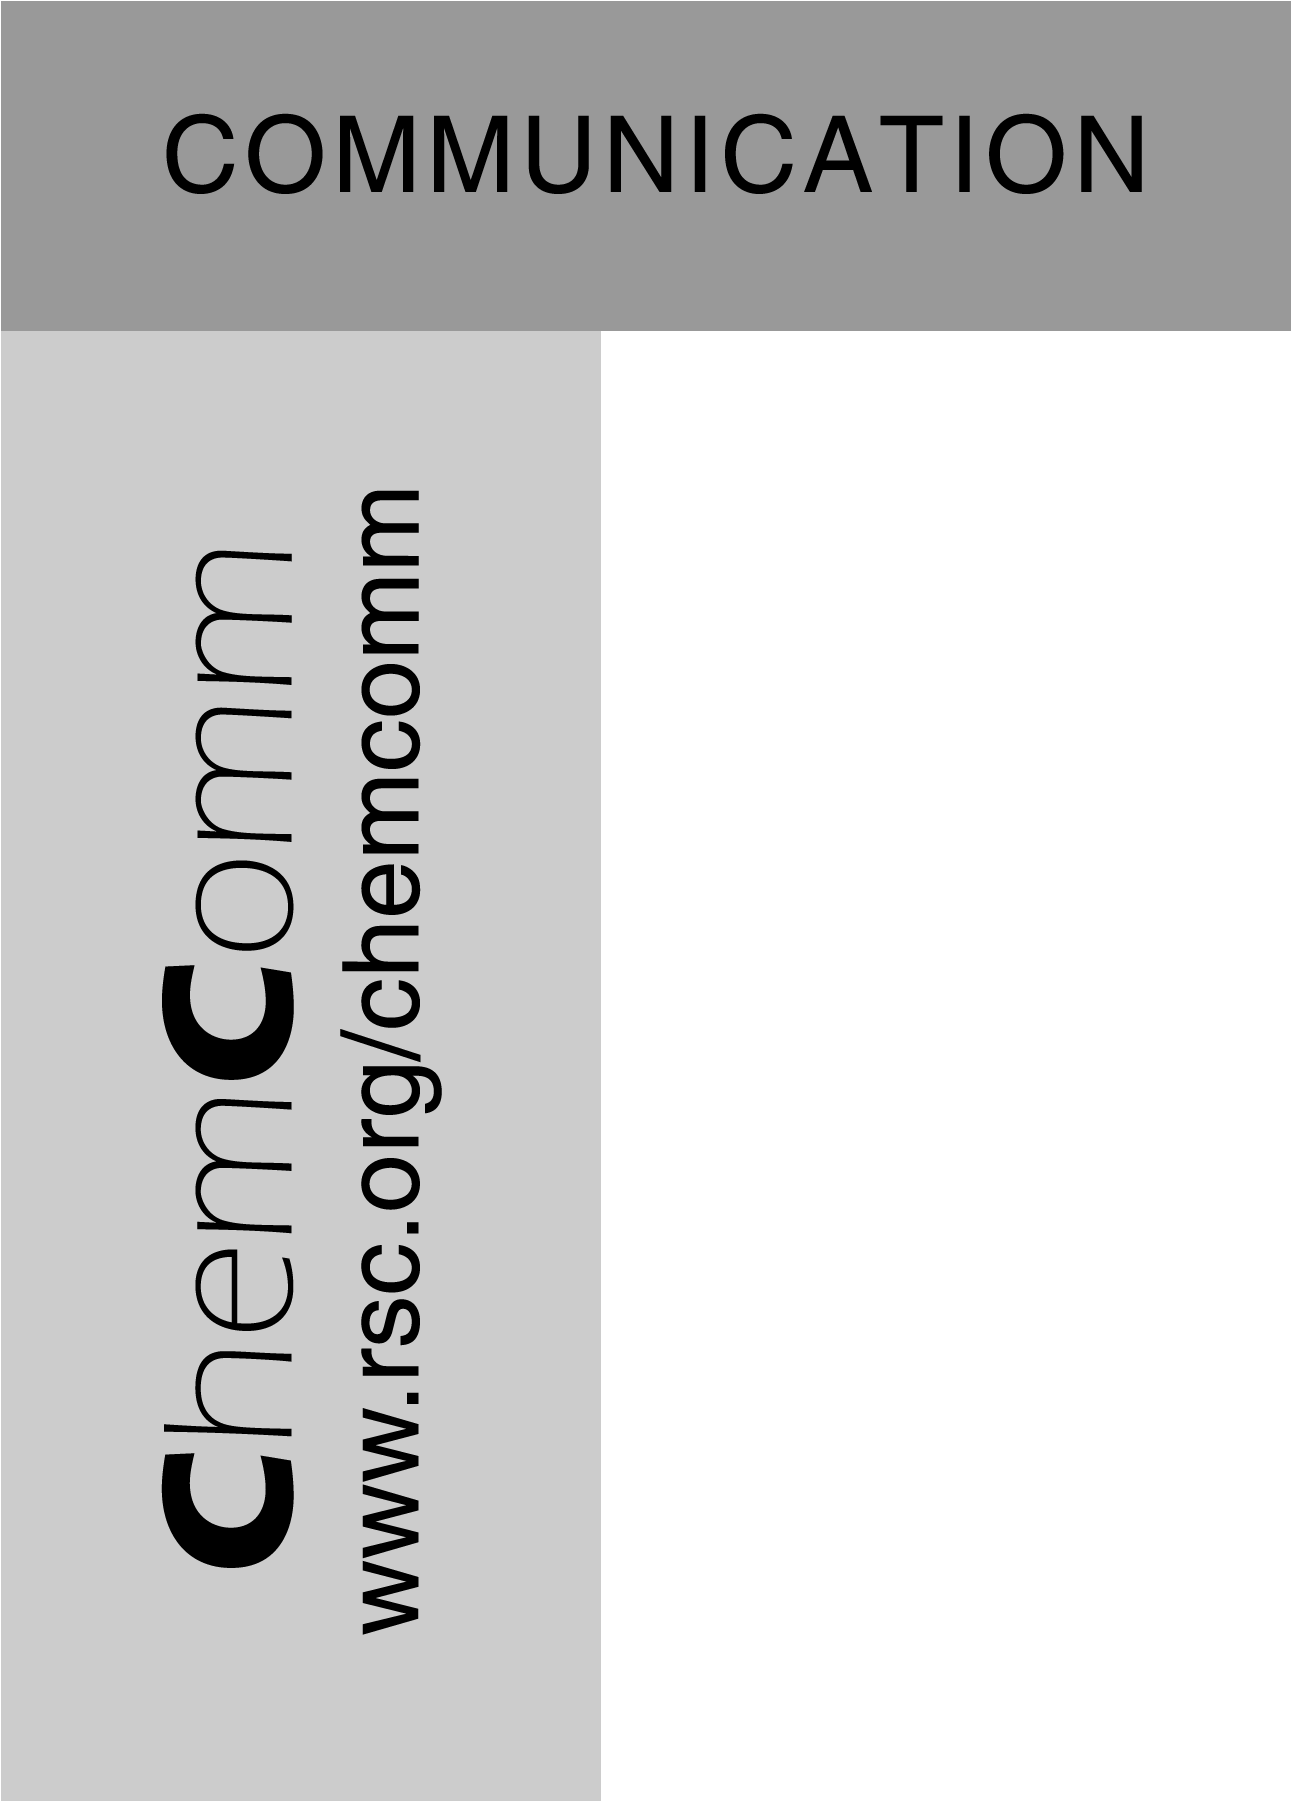
“Alternate Assemblies of Thionine and Au-Nanoparticle on Amino Fuctionalized Surface”

Wenlong Cheng, Junguang Jiang, Shaojun Dong*and Erkang Wang*

State Key Laboratory of Electroanalytical Chemistry, Changchun Institute of Applied Chemistry, Chinese Academy of Sciences, Changchun, Jilin 130022, P. R. China. Fax: +86-431-5689711; e-mail: [ekwang@ns.ciac.jl.cn](mailto:ekwang@ns.ciac.jl.cn).

This submission was created using the RSC ChemComm Template (DO NOT DELETE THIS TEXT)

(LINE INCLUDED FOR SPACING ONLY - DO NOT DELETE THIS TEXT)

**S-1 and S-2** shows the typical AFM images of Au-nanoparticle submonolayer and the assemblies with 9 bilayers of NPs:TH, respectively. The height value of the colloidal Au nanoparticles given by AFM is about 10 nm (APTMS aggregates have a height value of less than 5 nm). Also, it was observed that the large spacing existed between many isolated nanoparticles as shown in S-1 and the spacing becomes smaller with increasing layer numbers as shown in S-2. (lateral dimensions are different from S-1 due to different tips used, which results in different tip convolutions) The analysis of the line scans for the 9NPs:TH shows that the external surface of the superstructure consists of a high surface density of nanoparticles. It is noted that the alternate assemblies of the Au-nanoparticle and thionine are different from the other LBL assemblies (these assemblies resulted in the sandwich-like layering of organic and inorganic strata or isolated islands [(a)Schrof, W.; Rozouvan, S.; Vankeuren, E.; Horn, D.; Schmitt, J.; Decher, G. *Adv. Mater.* 1998, 10, 338. (b)Gao, M.; Zhang, X.; Yang, B.; Li, F.; Shen, J. *Thin Solid Films* 1996, 284. (c)Mamedov, A. A.; Kotov, N. A. *Langmuir* 2000, 16, 5530. (d) Decher, G. *Sience* 1997, 277, 1232. (e) Decher, G.; Hong, J. D. Ber. Bunsen-Ges. *Phys. Chem. Chem*. *Phys.* 1991, 95, 1430.]). whereas the present superstructure should be a uniform blend distribution of Au-nanoparticle and thionine in the superstructure.

**S-3** shows cyclic voltammograms of the as-prepared superstructure at different scan rates. The good linear relationship demonstrates surface-confined redox electrochemistry of electroactive species.

**S-4** shows the typical cyclic voltammograms demonstrating the electrocatalytic activity of the superstructure towards oxidation of NADH in 0.1 M KNO3 aqueous solution. The presence of 3 mM NADH causes a large negative shift as shown in S-4c in the anodic peak potential of about 390 mV in comparison with that of about 750 mV obtained at the bare gold disk electrode as shown in S-4a. The above fact demonstrates that thionine immobilized into the superstructure exhibits similar electrocatalytic activity towards NADH like thionine monolayer [See: (a) reference 15 and (b) Chen, H. Y.; Zhou, D. M.; Xu, J. J.; Fang, H. Q. J. Electroanal. Chem. 1997, 422, 21.]. The well-behaved electrocatalysis behaviors of thionine immobilized into the superstructure still demonstrates that the assemblies do not block electron transfer between the electrode and the electrolyte solution, and the constructed nano-scale architecture exhibits properties of metallic thin films, [Brown, K. R.; Lyon, L. A.; Fox, A. P.; Reiss, B. D.; Natan, M. J. *Chem. Mater.* 2000, 12, 314.] allowing them appropriate for macroscopic electrochemical measurements.

Three couples of redox peaks observed in S-4b are attributed to pH effects, as demonstrated by previous reports. [See: (a) reference 15 and (b) Chen, H. Y.; Zhou, D. M.; Xu, J. J.; Fang, H. Q. J. Electroanal. Chem. 1997, 422, 21.]


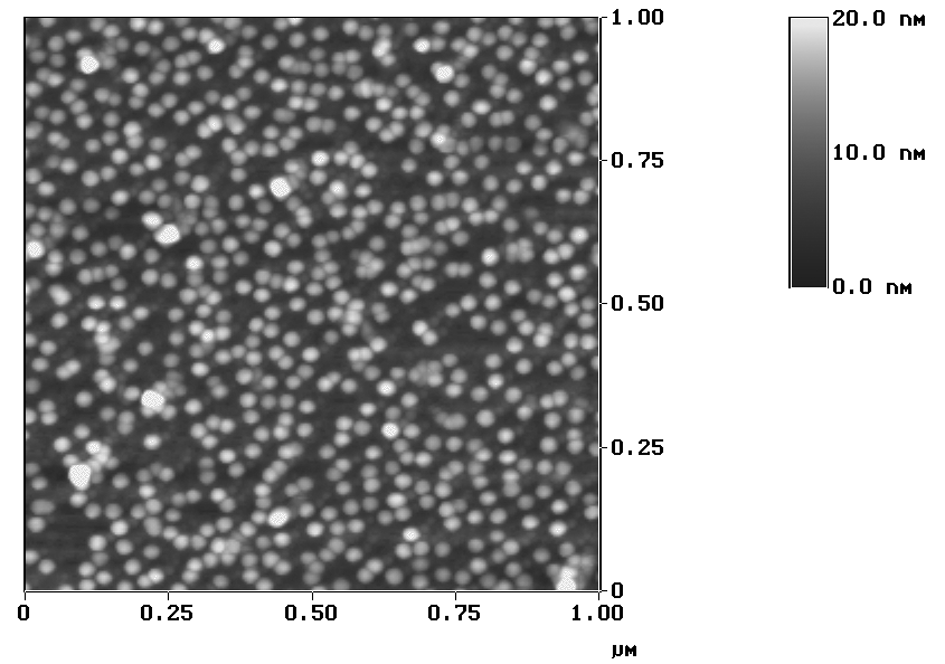


S-1 Typical tapping-mode AFM image of first Au-nanoparticle layer assembled on APTMS modified glass slide.


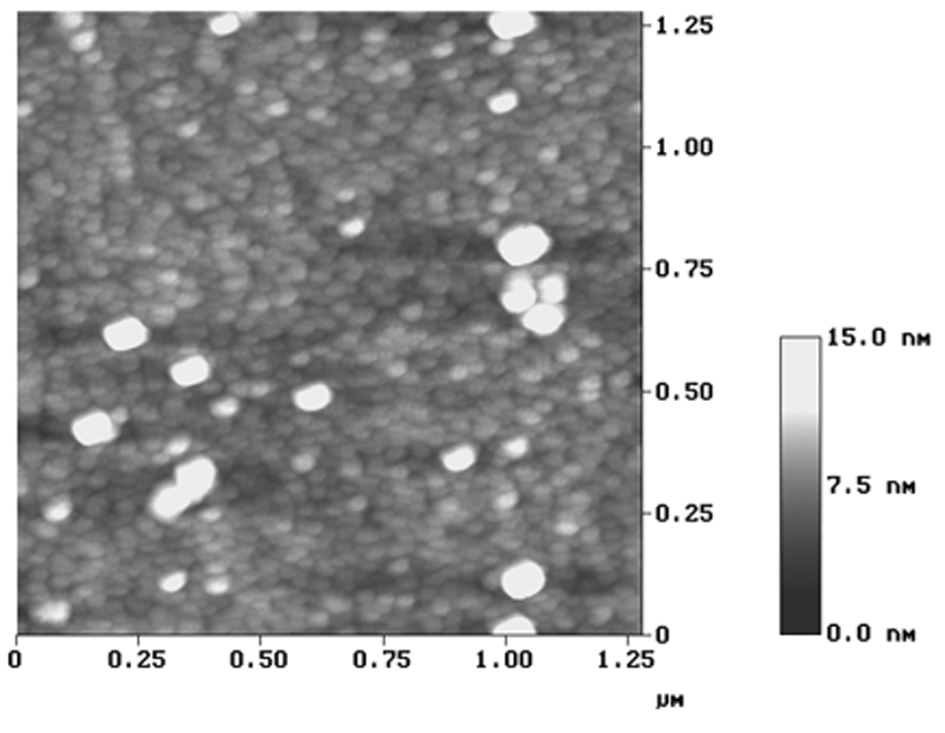


S-2 Typical tapping-mode AFM images of 9 bilayers of nanoparticle:thionine (1.5 μm2) on the glass surface. Lateral dimensions of nanoparticles are distorted due to the AFM tip convolution effect.

S-3Cyclic voltammograms of 13 nanoparticle:thionine bilayers modified gold electrode in 0.5 M H2SO4 at different scan rates of 10, 20, 50, 100, 200, 300, 400, 500, 600, 700, 800, and 900 mV/s, respectively.

S-4 Cyclic voltammograms at 50 mV/s of 13 nanoparticle:thionine bilayers modified gold electrode in 0.1 M KNO3 aqueous solution in the absence (b) and presence (c) of 3 mM NADH. Dash line (a): Cyclic voltammograms at 50 mV/s of clean bare gold electrode in 0.1 M KNO3 and 3 mM NADH aqueous solution.
